# Supplementary material for: Assessing Landslide Susceptibility by Coupling Spatial Data Analysis and Logistic Model
Source: MDPI journal article supplement (doi:10.3390/su14148426), 2022-07-09
Supplement: s1 [file s1]

ANNEX 2 Factors table

| Name                |                            | Code      | Data source                                                 | U.M.    |
|---------------------|----------------------------|-----------|-------------------------------------------------------------|---------|
| Topography          |                            |           | Digital Terrain Model (8 m resolution)<br>www.sit.puglia.it |         |
|                     | Elevation                  | T_DTM     | “                                                           | m       |
|                     | Flow accumulation          | T_F_acc   | “                                                           | -       |
|                     | Planform curvature         | T_Curv_pl | “                                                           | 1/100 m |
|                     | Profile curvature          | T_Curv_pr | “                                                           | 1/100 m |
|                     | Standard curvature         | T_Curv_st | “                                                           | 1/100 m |
|                     | Slope                      | T_Slope   | “                                                           | degree  |
| Aspect              | Slope aspect - north       | T_N       | “                                                           | %       |
|                     | Slope aspect - north east  | T_NE      | “                                                           | %       |
|                     | Slope aspect – east        | T_E       | “                                                           | %       |
|                     | Slope aspect - south east  | T_SE      | “                                                           | %       |
|                     | Slope aspect – south       | T_S       | “                                                           | %       |
|                     | Slope aspect - south west  | T_SW      | “                                                           | %       |
|                     | Slope aspect – west        | T_W       | “                                                           | %       |
|                     | Slope aspect - north west  | T_NW      | “                                                           | %       |
|                     | Slope aspect – flat        | T_FLAT    | “                                                           | %       |
| Topographic indexes | Slope roughness            | T_Slope_r | “                                                           | degree  |
|                     | Terrain roughness          | T_DTM_r   | “                                                           | m       |
|                     | Topographic wetness index  | T_TWI     | “                                                           | -       |
|                     | Vector Ruggedness Measure  | T_VRM     | “                                                           | -       |
|                     | Topographic Position Index | T_TPI     | “                                                           | -       |
|                     | Topographic factor         | T_Ls      | Slope Length and Steepness factor for                       | -       |

the EU

(25 m resolution)  
esdac.jrc.ec.europa.eu

#### Seismic Factor

|                                  |         |                                                                                                   |                  |
|----------------------------------|---------|---------------------------------------------------------------------------------------------------|------------------|
| Peak ground acceleration         | S_ag    | Peak ground acceleration map at 0.02 degrees<br>(1:25000 resolution)<br>www.pcn.minambiente.it    | m/s <sup>2</sup> |
| Distance to active fault         | S_Fault | Databases of individual seismogenic sources<br>diss.rm.ingv.it                                    | m                |
| Distance to earthquake epicenter | S_Epic  | Parametric Catalogue of Italian Earthquakes 2015<br>emidius.mi.ingv.it/CPTI15-DBMI15/index_en.htm | m                |

#### Geolithology

|                                                                     |       |                                                                        |   |
|---------------------------------------------------------------------|-------|------------------------------------------------------------------------|---|
| Terrace alluvium (% of cover area)                                  | G_TA  | Geolithological map<br>(1:500000 resolution)<br>www.pcn.minambiente.it | % |
| Sandstones and clays (% of cover area)                              | G_SSC | “ “                                                                    | % |
| Clays and marls (% of cover area)                                   | G_CM  | “ “                                                                    | % |
| Clays (% of cover area)                                             | G_C   | “ “                                                                    | % |
| Debris, alluvium and river-lake deposits, beaches (% of cover area) | G_DDB | “ “                                                                    | % |
| Lakes and glaciers (% of cover area)                                | G_LG  | “ “                                                                    | % |
| Sands and conglomerates (% of cover area)                           | G_SC  | “ “                                                                    | % |
| Sandy and sand-marly units (% of cover area)                        | G_SSM | “ “                                                                    | % |
| Clayey and clayey-limestone units (% of cover area)                 | G_CCL | “ “                                                                    | % |
| Marly limestone units (% of cover area)                             | G_ML  | “ “                                                                    | % |

#### Pedology

|                                      |        |                                        |   |
|--------------------------------------|--------|----------------------------------------|---|
| Percentage of clay (% of cover area) | P_clay | Topsoil physical properties for Europe | % |
|--------------------------------------|--------|----------------------------------------|---|

|                                                |         |                                                                                                |                                              |    |
|------------------------------------------------|---------|------------------------------------------------------------------------------------------------|----------------------------------------------|----|
|                                                |         |                                                                                                | (500 m resolution)<br>esdac.jrc.ec.europa.eu |    |
| Percentage of sand (% of cover area)           | P_sand  | “ “                                                                                            |                                              | %  |
| Percentage of silt (% of cover area)           | P_silt  | “ “                                                                                            |                                              | %  |
| <b>Land Cover</b>                              |         |                                                                                                |                                              |    |
|                                                |         |                                                                                                | Corine Land Cover 1990 and 2018              |    |
| Urban area (% of cover area)                   | LU_urb  | (100 m and 25 m resolution)<br>land.copernicus.eu                                              |                                              | %  |
| Agricultural area (% of cover area)            | LU_agri | “ “                                                                                            |                                              | %  |
| Grassland (% of cover area)                    | LU_grs  | “ “                                                                                            |                                              | %  |
| Forest (% of cover area)                       | LU_for  | “ “                                                                                            |                                              | %  |
| Natural area (% of cover area)                 | LU_nat  | “ “                                                                                            |                                              | %  |
| Rivers and lakes (% of cover area)             | LU_wat  | “ “                                                                                            |                                              | %  |
| <b>Morphology</b>                              |         |                                                                                                |                                              |    |
|                                                |         |                                                                                                | Hydrogeomorphological map                    |    |
| Distance to rivers                             | D_riv   | (1:25000 resolution)<br>www.sit.puglia.it                                                      |                                              | m  |
|                                                |         |                                                                                                | Land use map (2011)                          |    |
| Distance to roads                              | D_road  | (1:5000 resolution)<br>www.sit.puglia.it                                                       |                                              | m  |
| <b>Climate</b>                                 |         |                                                                                                |                                              |    |
| Mean annual maximum rainfall observed in 1 day | C_p_max | National database for processing and<br>disseminating climate data<br>www.scia.isprambiente.it |                                              | mm |
| Mean annual rainfall                           | C_p_cum | National database for processing and<br>disseminating climate data<br>www.scia.isprambiente.it |                                              | mm |
