# Supplementary material for: Assessing Landslide Susceptibility by Coupling Spatial Data Analysis and Logistic Model
Source: MDPI journal article supplement (doi:10.3390/su14148426), 2022-07-09
Supplement: s1 [file s1]

Archive with 3 entries (3 files):
- Figure S1_ maps of some important factors.png
- Table S1_correlation_matrix.xls
- Table S2_factors_table.pdf
