# Supplementary material for: Assessing Landslide Susceptibility by Coupling Spatial Data Analysis and Logistic Model
Source: MDPI journal article supplement (doi:10.3390/su14148426), 2022-07-09
Supplement: s1 [file s1 › Table S1_correlation_matrix.xls]

## Sheet: corr
Table S1: Correlation matrix among the considered variables
	T_TWI	T_VRM	T_DTM	T_F_acc	T_Curv_pl	T_Curv_st	T_N	T_NE	T_E	T_SE	T_S	T_SW	T_W	T_NW	T_FLAT	T_Ls	T_TPI	S_Epic	G_TA	G_SSC	G_CM	G_C	G_DDB	G_LG	G_SC	G_SSM	G_CCL	G_ML	P_sand	P_silt	LU_urb	LU_grs	LU_for	LU_nat	D_riv	D_road	C_p_max
T_TWI	1	-0.0442925	-0.0991737	0.0564231	-0.13837	-0.273156	0.0344691	-0.0259661	0.0101298	-0.051606	-0.0277151	-0.0602287	0.0504418	-0.0100642	0.16839	0.234315	-0.47177	0.0438095	-0.00610117	-0.0223426	0.0201144	0.00604303	-0.0118102	0.198769	-0.0217048	-0.0199688	0.00899731	-0.00949404	-0.0360543	-0.00378411	-0.0291808	-0.0334827	0.0252061	0.0194653	-0.0206706	0.0435769	0.0507841
T_VRM	-0.0442925	1	0.149486	-0.0821705	0.109619	0.056486	-0.205822	-0.0758865	0.121438	0.0194349	-0.0898084	0.0184361	0.173373	-0.00578973	-0.0589105	0.682531	0.0732039	0.0922341	-0.0297674	-0.0125911	0.0225654	-0.114965	-0.0496828	-0.0660257	-0.0343359	-0.0410294	-0.175978	0.261254	-0.144356	0.0137133	-0.0358845	0.116619	0.399671	0.0591692	-0.0796353	0.155761	0.141986
T_DTM	-0.0991737	0.149486	1	-0.206848	-0.0984581	0.0723778	-0.0967	-0.035009	0.0449867	0.0132281	0.0365771	0.0617336	0.0169832	-0.0308157	-0.0992946	0.0834102	0.120556	-0.135518	-0.0474832	-0.14949	0.0998423	-0.160647	-0.225467	-0.147199	0.0265445	0.00773162	-0.14905	0.319371	0.106691	-0.376682	0.0205071	0.179604	0.13208	-0.0606741	0.422211	-0.136652	0.26848
T_F_acc	0.0564231	-0.0821705	-0.206848	1	0.116447	-0.10679	0.0241608	0.00761231	-0.00842393	0.000500466	-0.00904571	-0.00800225	-0.00878438	0.0037977	-0.00479564	-0.0759451	-0.180977	0.0275106	-0.00992251	0.0884659	-0.0197382	0.0121569	-0.00263002	-0.00928963	0.0237485	-0.0188841	-0.001125	-0.0525311	-0.0170049	-0.0720826	-0.0184658	-0.0209906	-0.0251693	0.119704	-0.132058	-0.00431791	-0.0359923
T_Curv_pl	-0.13837	0.109619	-0.0984581	0.116447	1	0.482991	0.0176421	0.0120414	1.98397e-05	-0.0128519	-0.0222501	-0.00837852	-0.00156653	0.0153694	-0.00876646	-0.0291483	0.0642013	-0.0206162	0.00638991	0.00875363	0.00930917	0.0139558	0.000162776	0.0040307	0.0433313	-0.00675191	-0.00409713	-0.0415751	0.0128622	-0.000781552	-0.00625871	-0.00150319	0.0237093	0.0132335	-0.0400038	0.0168391	-0.0314229
T_Curv_st	-0.273156	0.056486	0.0723778	-0.10679	0.482991	1	-0.0134591	-0.00450515	0.0145328	-0.00544457	-0.00926167	0.00488807	0.00878383	4.08549e-05	-0.00687105	-0.106189	0.489093	-0.0122063	0.0134167	-0.00332964	-0.00138976	-0.00590534	-0.000822296	-0.00703902	0.00803213	0.00559818	-0.0151802	0.0109521	0.00927062	0.00313468	0.017834	0.0232876	-0.0086511	-0.0306903	0.0118068	-0.0135243	-0.0134058
T_N	0.0344691	-0.205822	-0.0967	0.0241608	0.0176421	-0.0134591	1	0.443915	-0.160151	-0.511162	-0.715972	-0.477242	-0.148704	0.438331	-0.0456709	0.0292036	-0.0217154	0.0740049	0.0188912	-0.0375836	0.0424113	0.0657564	0.042297	-0.0566478	0.0125171	0.0378539	0.0082901	-0.0586898	-0.00677587	0.0207459	0.0016203	-0.0628191	0.142334	0.03171	-0.0994264	0.0837651	0.0640871
T_NE	-0.0259661	-0.0758865	-0.035009	0.00761231	0.0120414	-0.00450515	0.443915	1	0.435568	-0.27447	-0.504478	-0.416261	-0.521644	-0.287648	-0.0477303	-0.0159149	-0.00875061	0.0951161	0.0645211	-0.0775598	0.100615	0.147629	0.0474919	0.0097622	0.00465408	-0.00274896	0.0322406	-0.120781	-0.0667345	0.0497962	-0.023792	-0.0427744	0.0382265	-0.028268	-0.03998	0.0758292	0.0954034
T_E	0.0101298	0.121438	0.0449867	-0.00842393	1.98397e-05	0.0145328	-0.160151	0.435568	1	0.43883	-0.0984361	-0.481042	-0.744725	-0.542498	-0.0544173	-0.0141977	0.00869809	0.0270005	0.0360298	-0.107721	0.0169649	0.1161	0.027441	-0.0325668	0.0524103	-0.0409656	0.0687171	-0.104888	-0.00455645	0.0575308	-0.00815103	-0.0151943	-0.0321115	-0.0976466	0.0536368	0.0329117	0.0454823
T_SE	-0.051606	0.0194349	0.0132281	0.000500466	-0.0128519	-0.00544457	-0.511162	-0.27447	0.43883	1	0.514106	-0.197274	-0.448003	-0.402735	-0.0377244	-0.0440162	0.00634971	-0.0572036	-0.00548725	-0.0488516	-0.0600451	0.0383724	-0.0269196	-0.0135208	0.0663183	-0.0390512	0.0485374	-0.0445371	0.0603676	0.034381	0.0146574	0.013446	-0.066258	-0.0761117	0.0716312	-0.06325	-0.0717709
T_S	-0.0277151	-0.0898084	0.0365771	-0.00904571	-0.0222501	-0.00926167	-0.715972	-0.504478	-0.0984361	0.514106	1	0.489278	-0.059209	-0.433491	-0.0363532	-0.0327074	0.0119283	-0.0989204	-0.0312256	0.0392581	-0.0765314	-0.0542224	-0.0640794	-0.0242947	0.0235206	-0.0192256	0.0207407	0.0291757	0.0449559	-0.0432935	0.0123216	0.042338	-0.106483	-0.019688	0.0793686	-0.144623	-0.110647
T_SW	-0.0602287	0.0184361	0.0617336	-0.00800225	-0.00837852	0.00488807	-0.477242	-0.416261	-0.481042	-0.197274	0.489278	1	0.467637	-0.189863	-0.0320637	-0.000283235	0.00779588	-0.0604429	-0.0296284	0.100933	-0.0349586	-0.112031	-0.0469517	0.00921981	-0.0456785	0.0209439	-0.0546111	0.10809	-0.00743476	-0.0786776	-0.0148394	0.0503745	-0.0888133	0.0639087	0.0366885	-0.0990195	-0.0402299
T_W	0.0504418	0.173373	0.0169832	-0.00878438	-0.00156653	0.00878383	-0.148704	-0.521644	-0.744725	-0.448003	-0.059209	0.467637	1	0.465897	0.156706	0.0398197	0.00452597	-0.0110835	-0.0376388	0.113656	-0.00905335	-0.142503	-0.0103597	0.0948912	-0.0864549	0.0196724	-0.087952	0.142974	-0.0282223	-0.0440896	-0.00202923	0.0399422	-0.0130656	0.0824469	-0.0263576	0.0102496	-0.0169096
T_NW	-0.0100642	-0.00578973	-0.0308157	0.0037977	0.0153694	4.08549e-05	0.438331	-0.287648	-0.542498	-0.402735	-0.433491	-0.189863	0.465897	1	-0.0225014	0.0235159	-0.010373	0.00336708	-0.0203315	0.0319321	0.0113728	-0.080347	0.0112366	-0.035682	-0.0213364	0.0277873	-0.0429354	0.0694697	0.0259436	-0.0138604	0.0241759	-0.0162553	0.117361	0.0547765	-0.0663148	0.0717378	0.0138834
T_FLAT	0.16839	-0.0589105	-0.0992946	-0.00479564	-0.00876646	-0.00687105	-0.0456709	-0.0477303	-0.0544173	-0.0377244	-0.0363532	-0.0320637	0.156706	-0.0225014	1	-0.108489	0.00329898	-0.00926884	-0.00631522	0.0364313	-0.00558211	-0.00976093	0.00426439	0.554614	-0.0213742	-0.00263807	-0.0278908	-0.0475127	0.00654242	0.039868	0.000602863	-0.00548022	-0.0328684	-0.0118473	0.00500252	0.000909211	-0.0520888
T_Ls	0.234315	0.682531	0.0834102	-0.0759451	-0.0291483	-0.106189	0.0292036	-0.0159149	-0.0141977	-0.0440162	-0.0327074	-0.000283235	0.0398197	0.0235159	-0.108489	1	-0.173556	0.130248	-0.0365063	-0.0212846	0.0775001	-0.120502	-0.0760386	-0.122669	-0.0333398	-0.0321624	-0.166118	0.256086	-0.175265	-0.0262196	-0.052482	0.0875047	0.485857	0.11655	-0.136406	0.167895	0.199778
T_TPI	-0.47177	0.0732039	0.120556	-0.180977	0.0642013	0.489093	-0.0217154	-0.00875061	0.00869809	0.00634971	0.0119283	0.00779588	0.00452597	-0.010373	0.00329898	-0.173556	1	-0.0148847	0.00513975	-0.0081259	-0.00874213	-0.000766079	-0.00225019	-0.0081011	0.00509027	0.0100783	-0.0208919	0.0204748	0.0162988	-0.00292416	0.020684	0.0430967	-0.00201631	-0.0364634	0.0191525	-0.0310808	-0.00840635
S_Epic	0.0438095	0.0922341	-0.135518	0.0275106	-0.0206162	-0.0122063	0.0740049	0.0951161	0.0270005	-0.0572036	-0.0989204	-0.0604429	-0.0110835	0.00336708	-0.00926884	0.130248	-0.0148847	1	0.0634973	0.0040032	-0.121261	0.157737	0.0363349	-0.020995	-0.37936	-0.00779356	0.0559999	0.168224	-0.732328	0.0122201	-0.0276698	-0.0823495	0.113324	0.030542	-0.636292	0.0545483	0.578125
G_TA	-0.00610117	-0.0297674	-0.0474832	-0.00992251	0.00638991	0.0134167	0.0188912	0.0645211	0.0360298	-0.00548725	-0.0312256	-0.0296284	-0.0376388	-0.0203315	-0.00631522	-0.0365063	0.00513975	0.0634973	1	-0.0143853	-0.0095324	0.00905824	-0.00912878	-0.0040594	-0.0193857	-0.00534874	-0.0241779	-0.0440307	-0.0462306	0.0526424	-0.00496029	-0.00889215	-0.0317145	-0.0110435	-0.0355179	-0.0283502	0.0375854
G_SSC	-0.0223426	-0.0125911	-0.14949	0.0884659	0.00875363	-0.00332964	-0.0375836	-0.0775598	-0.107721	-0.0488516	0.0392581	0.100933	0.113656	0.0319321	0.0364313	-0.0212846	-0.0081259	0.0040032	-0.0143853	1	-0.0467244	-0.0735015	-0.0440155	-0.00581552	-0.106583	-0.0262176	-0.134788	-0.231618	-0.126094	-0.212393	-0.00486131	-0.0435862	-0.0724926	0.161553	0.0271048	-0.0500607	-0.12812
G_CM	0.0201144	0.0225654	0.0998423	-0.0197382	0.00930917	-0.00138976	0.0424113	0.100615	0.0169649	-0.0600451	-0.0765314	-0.0349586	-0.00905335	0.0113728	-0.00558211	0.0775001	-0.00874213	-0.121261	-0.0095324	-0.0467244	1	-0.0487057	-0.0296509	-0.0131852	-0.0641797	-0.0173731	-0.093215	-0.146042	0.0758668	-0.0353104	0.0564655	0.0542943	-0.011812	-0.029602	0.0458094	-0.00122347	0.057205
G_C	0.00604303	-0.114965	-0.160647	0.0121569	0.0139558	-0.00590534	0.0657564	0.147629	0.1161	0.0383724	-0.0542224	-0.112031	-0.142503	-0.080347	-0.00976093	-0.120502	-0.000766079	0.157737	0.00905824	-0.0735015	-0.0487057	1	-0.0281112	-0.0207414	-0.0999733	-0.0273293	-0.144095	-0.243993	-0.0986113	0.0489306	-0.0253445	-0.0454343	-0.0754957	-0.0278831	-0.109119	-0.0516102	0.0261249
G_DDB	-0.0118102	-0.0496828	-0.225467	-0.00263002	0.000162776	-0.000822296	0.042297	0.0474919	0.027441	-0.0269196	-0.0640794	-0.0469517	-0.0103597	0.0112366	0.00426439	-0.0760386	-0.00225019	0.0363349	-0.00912878	-0.0440155	-0.0296509	-0.0281112	1	-0.00398045	-0.0716735	-0.0166374	-0.0867145	-0.142478	-0.11851	0.315541	-0.0154292	-0.0276594	-0.0613498	0.00889373	-0.0588869	0.0505636	-0.0806906
G_LG	0.198769	-0.0660257	-0.147199	-0.00928963	0.0040307	-0.00703902	-0.0566478	0.0097622	-0.0325668	-0.0135208	-0.0242947	0.00921981	0.0948912	-0.035682	0.554614	-0.122669	-0.0081011	-0.020995	-0.0040594	-0.00581552	-0.0131852	-0.0207414	-0.00398045	1	-0.0318719	-0.00739836	-0.0365208	-0.0604936	0.000306682	0.0482065	-0.00686106	-0.0122996	-0.00676365	-0.0152753	-0.0159269	-0.00543814	-0.00799682
G_SC	-0.0217048	-0.0343359	0.0265445	0.0237485	0.0433313	0.00803213	0.0125171	0.00465408	0.0524103	0.0663183	0.0235206	-0.0456785	-0.0864549	-0.0213364	-0.0213742	-0.0333398	0.00509027	-0.37936	-0.0193857	-0.106583	-0.0641797	-0.0999733	-0.0716735	-0.0318719	1	-0.041995	-0.220195	-0.364946	0.232672	-0.0922287	-0.00428229	-0.065611	0.000307276	-0.0696737	0.31231	-0.019123	-0.146996
G_SSM	-0.0199688	-0.0410294	0.00773162	-0.0188841	-0.00675191	0.00559818	0.0378539	-0.00274896	-0.0409656	-0.0390512	-0.0192256	0.0209439	0.0196724	0.0277873	-0.00263807	-0.0321624	0.0100783	-0.00779356	-0.00534874	-0.0262176	-0.0173731	-0.0273293	-0.0166374	-0.00739836	-0.041995	1	-0.0321699	-0.0886894	0.153853	0.00546707	0.0826875	-0.0162062	-0.0512715	0.012851	0.0514656	-0.0474014	-0.077102
G_CCL	0.00899731	-0.175978	-0.14905	-0.001125	-0.00409713	-0.0151802	0.0082901	0.0322406	0.0687171	0.0485374	0.0207407	-0.0546111	-0.087952	-0.0429354	-0.0278908	-0.166118	-0.0208919	0.0559999	-0.0241779	-0.134788	-0.093215	-0.144095	-0.0867145	-0.0365208	-0.220195	-0.0321699	1	-0.463041	0.224224	-0.0750633	-0.0438824	0.0321428	-0.183128	-0.0328558	-0.0881881	0.0640805	-0.134121
G_ML	-0.00949404	0.261254	0.319371	-0.0525311	-0.0415751	0.0109521	-0.0586898	-0.120781	-0.104888	-0.0445371	0.0291757	0.10809	0.142974	0.0694697	-0.0475127	0.256086	0.0204748	0.168224	-0.0440307	-0.231618	-0.146042	-0.243993	-0.142478	-0.0604936	-0.364946	-0.0886894	-0.463041	1	-0.251	0.107556	0.0267985	0.0601908	0.261489	0.0187255	-0.107282	0.00740085	0.283489
P_sand	-0.0360543	-0.144356	0.106691	-0.0170049	0.0128622	0.00927062	-0.00677587	-0.0667345	-0.00455645	0.0603676	0.0449559	-0.00743476	-0.0282223	0.0259436	0.00654242	-0.175265	0.0162988	-0.732328	-0.0462306	-0.126094	0.0758668	-0.0986113	-0.11851	0.000306682	0.232672	0.153853	0.224224	-0.251	1	-0.134529	-0.0018049	0.0493865	-0.126876	-0.0382952	0.41053	0.0435655	-0.548785
P_silt	-0.00378411	0.0137133	-0.376682	-0.0720826	-0.000781552	0.00313468	0.0207459	0.0497962	0.0575308	0.034381	-0.0432935	-0.0786776	-0.0440896	-0.0138604	0.039868	-0.0262196	-0.00292416	0.0122201	0.0526424	-0.212393	-0.0353104	0.0489306	0.315541	0.0482065	-0.0922287	0.00546707	-0.0750633	0.107556	-0.134529	1	0.0514377	-0.0722782	0.0037665	-0.0270671	0.0760627	0.100181	-0.206922
LU_urb	-0.0291808	-0.0358845	0.0205071	-0.0184658	-0.00625871	0.017834	0.0016203	-0.023792	-0.00815103	0.0146574	0.0123216	-0.0148394	-0.00202923	0.0241759	0.000602863	-0.052482	0.020684	-0.0276698	-0.00496029	-0.00486131	0.0564655	-0.0253445	-0.0154292	-0.00686106	-0.00428229	0.0826875	-0.0438824	0.0267985	-0.0018049	0.0514377	1	-0.0150292	-0.0444081	-0.0176688	0.0401891	-0.0622313	0.0011247
LU_grs	-0.0334827	0.116619	0.179604	-0.0209906	-0.00150319	0.0232876	-0.0628191	-0.0427744	-0.0151943	0.013446	0.042338	0.0503745	0.0399422	-0.0162553	-0.00548022	0.0875047	0.0430967	-0.0823495	-0.00889215	-0.0435862	0.0542943	-0.0454343	-0.0276594	-0.0122996	-0.065611	-0.0162062	0.0321428	0.0601908	0.0493865	-0.0722782	-0.0150292	1	-0.075569	-0.0125361	0.0167579	0.0293526	0.0165066
LU_for	0.0252061	0.399671	0.13208	-0.0251693	0.0237093	-0.0086511	0.142334	0.0382265	-0.0321115	-0.066258	-0.106483	-0.0888133	-0.0130656	0.117361	-0.0328684	0.485857	-0.00201631	0.113324	-0.0317145	-0.0724926	-0.011812	-0.0754957	-0.0613498	-0.00676365	0.000307276	-0.0512715	-0.183128	0.261489	-0.126876	0.0037665	-0.0444081	-0.075569	1	-0.110402	-0.0910143	0.142392	0.23212
LU_nat	0.0194653	0.0591692	-0.0606741	0.119704	0.0132335	-0.0306903	0.03171	-0.028268	-0.0976466	-0.0761117	-0.019688	0.0639087	0.0824469	0.0547765	-0.0118473	0.11655	-0.0364634	0.030542	-0.0110435	0.161553	-0.029602	-0.0278831	0.00889373	-0.0152753	-0.0696737	0.012851	-0.0328558	0.0187255	-0.0382952	-0.0270671	-0.0176688	-0.0125361	-0.110402	1	-0.0740704	-0.00498474	-0.0221432
D_riv	-0.0206706	-0.0796353	0.422211	-0.132058	-0.0400038	0.0118068	-0.0994264	-0.03998	0.0536368	0.0716312	0.0793686	0.0366885	-0.0263576	-0.0663148	0.00500252	-0.136406	0.0191525	-0.636292	-0.0355179	0.0271048	0.0458094	-0.109119	-0.0588869	-0.0159269	0.31231	0.0514656	-0.0881881	-0.107282	0.41053	0.0760627	0.0401891	0.0167579	-0.0910143	-0.0740704	1	-0.135187	-0.344454
D_road	0.0435769	0.155761	-0.136652	-0.00431791	0.0168391	-0.0135243	0.0837651	0.0758292	0.0329117	-0.06325	-0.144623	-0.0990195	0.0102496	0.0717378	0.000909211	0.167895	-0.0310808	0.0545483	-0.0283502	-0.0500607	-0.00122347	-0.0516102	0.0505636	-0.00543814	-0.019123	-0.0474014	0.0640805	0.00740085	0.0435655	0.100181	-0.0622313	0.0293526	0.142392	-0.00498474	-0.135187	1	-0.0540194
C_p_max	0.0507841	0.141986	0.26848	-0.0359923	-0.0314229	-0.0134058	0.0640871	0.0954034	0.0454823	-0.0717709	-0.110647	-0.0402299	-0.0169096	0.0138834	-0.0520888	0.199778	-0.00840635	0.578125	0.0375854	-0.12812	0.057205	0.0261249	-0.0806906	-0.00799682	-0.146996	-0.077102	-0.134121	0.283489	-0.548785	-0.206922	0.0011247	0.0165066	0.23212	-0.0221432	-0.344454	-0.0540194	1
