# Supplementary figures and images for: Assessing Landslide Susceptibility by Coupling Spatial Data Analysis and Logistic Model
Source: MDPI journal article supplement (doi:10.3390/su14148426), 2022-07-09

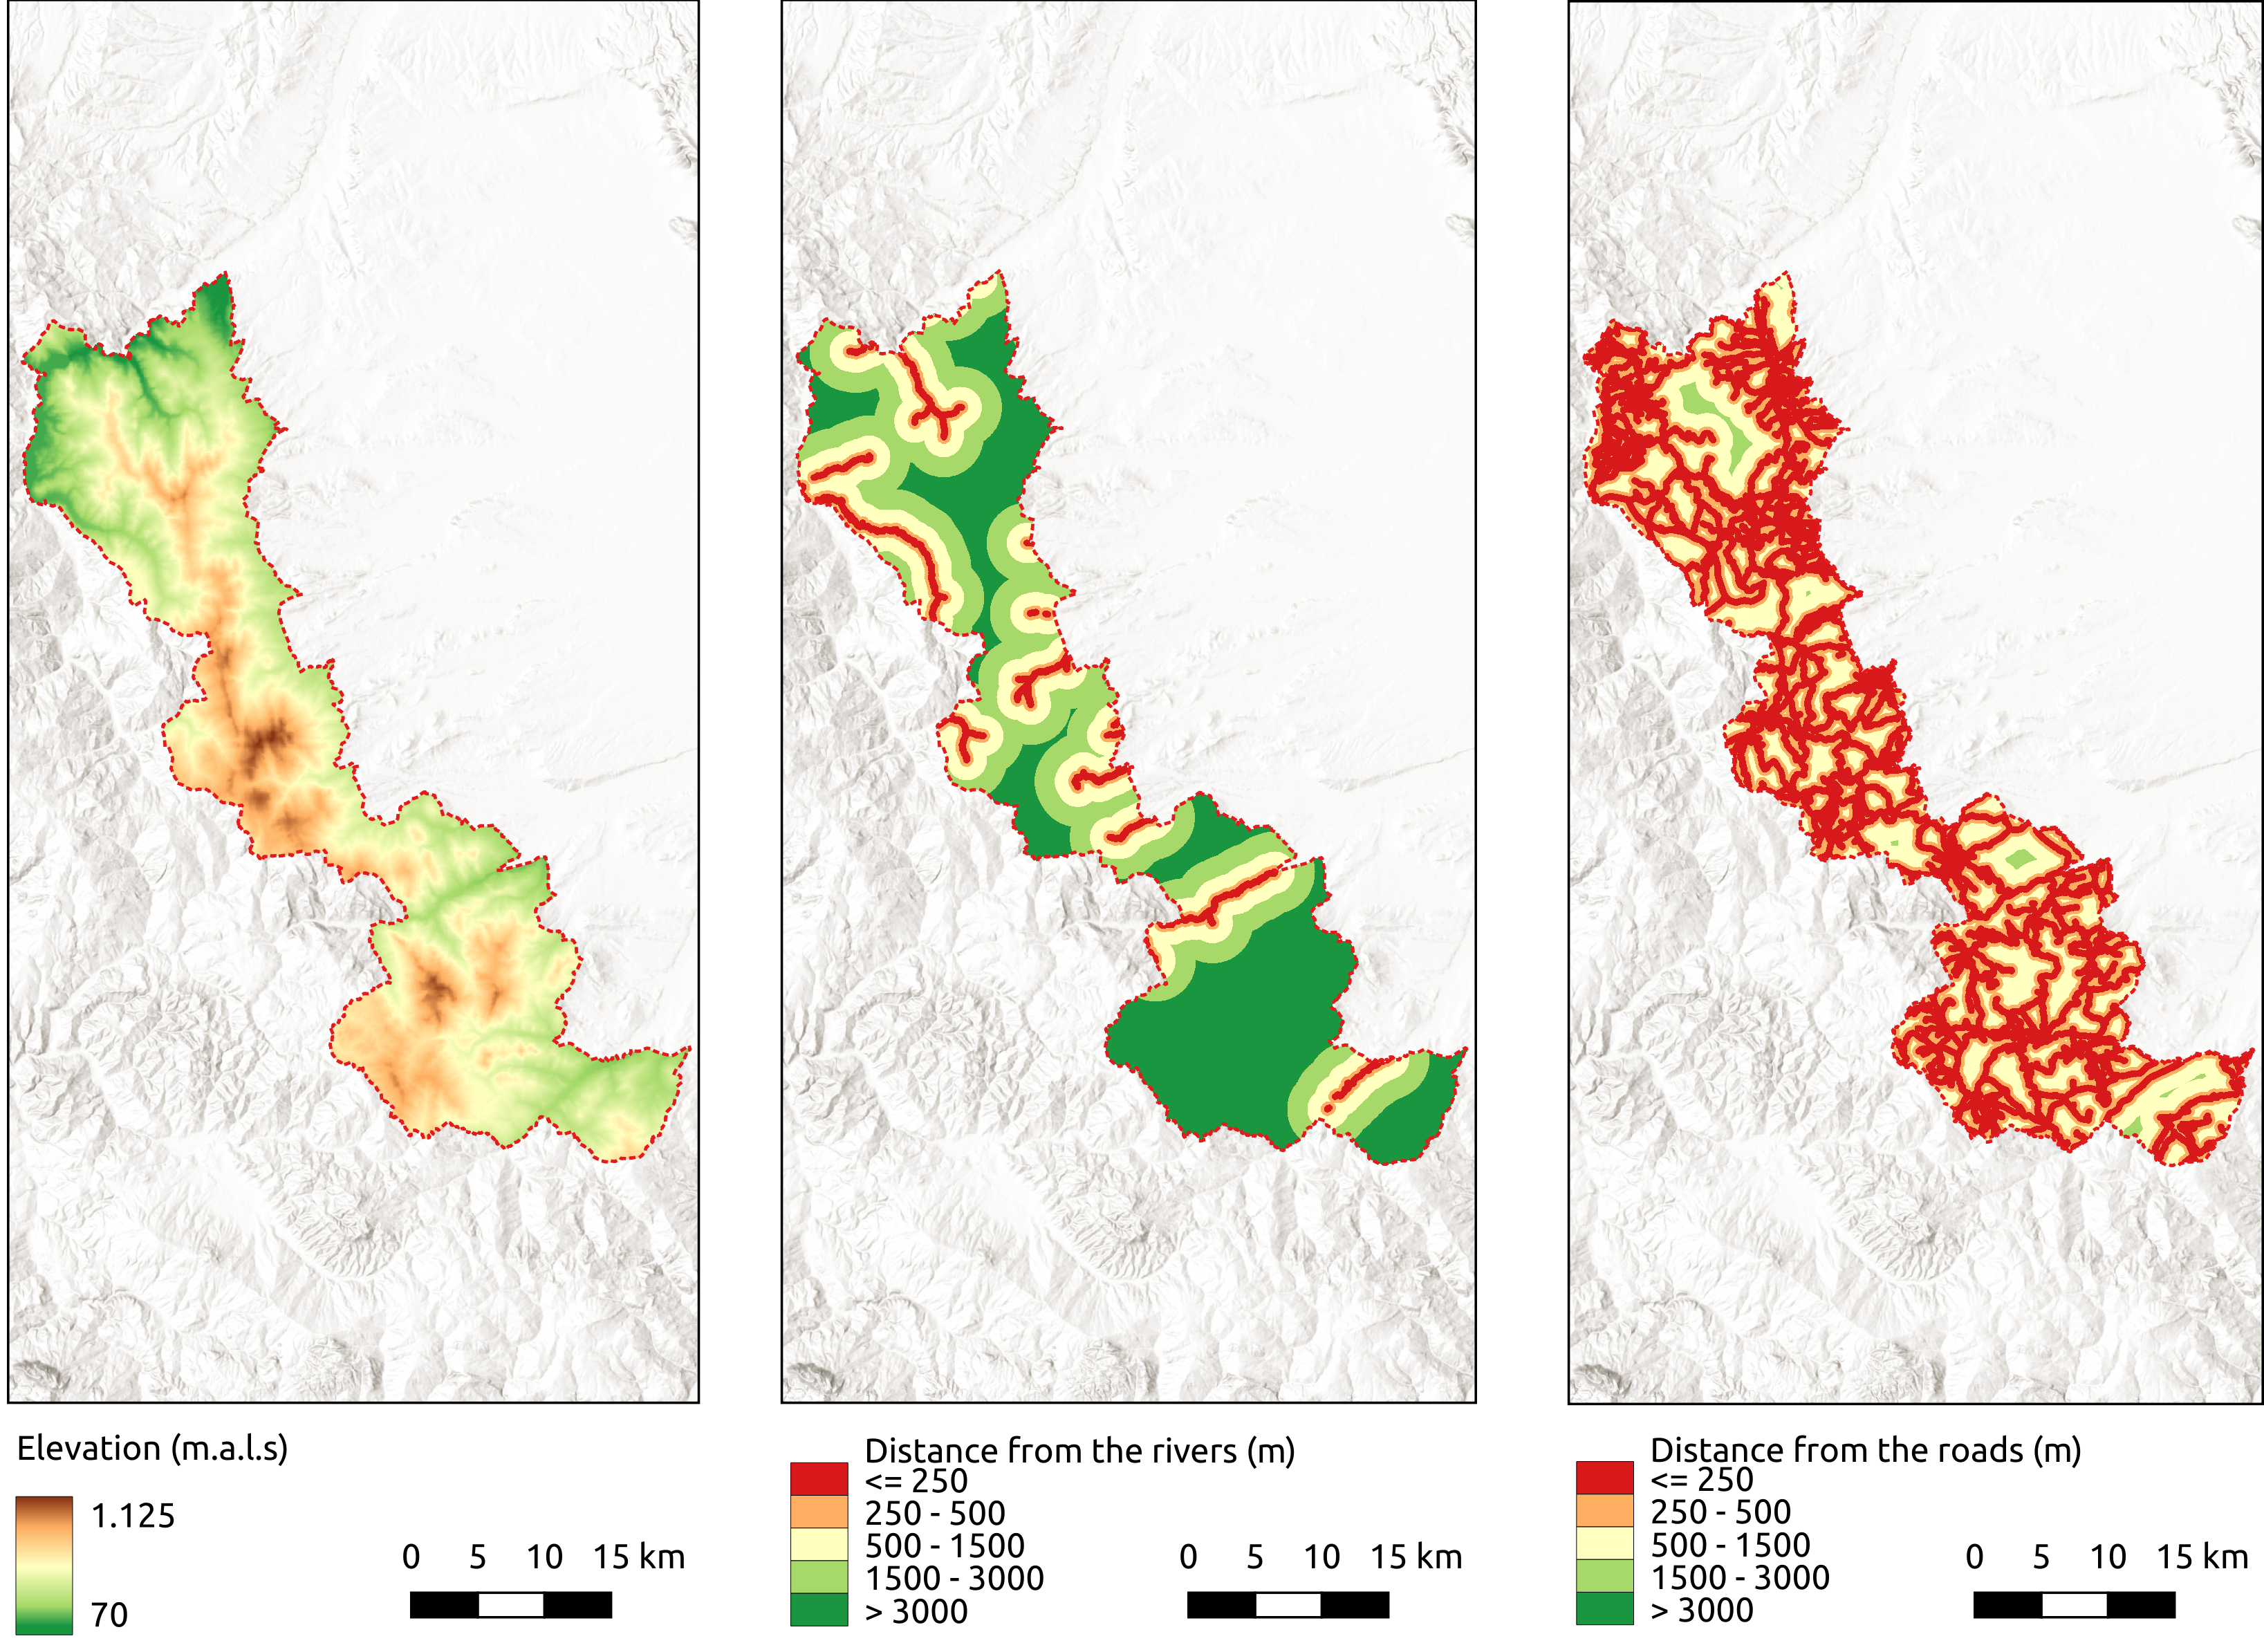

Supplement: s1 [file s1 › Figure S1_ maps of some important factors.png]
